# Supplementary material for: Malaria Parasite-Infected Erythrocytes Secrete PfCK1, the Plasmodium Homologue of the Pleiotropic Protein Kinase Casein Kinase 1
Source: PubMed Central journal article supplement (PMC4668060; doi:10.1371/journal.pone.0139591), 2015-12-02
Supplement: pone.0139591.s004.pdf [file pone.0139591.s004.pdf]

|    | New Plasmodb accession number | Previous Plasmodb accession number | Annotation                                            |
|----|-------------------------------|------------------------------------|-------------------------------------------------------|
| 1  | PF3D7_1341300                 | MAL13P1.209                        | ribosomal protein L18-2                               |
| 2  | PF3D7_1314700                 | MAL13P1.75                         | conserved Plasmodium protein                          |
| 3  | PF3D7_0823200                 | MAL8P1.40                          | RNA binding protein                                   |
| 4  | PF3D7_0822800                 | MAL8P1.43                          | U5 snrnp-specific protein                             |
| 5  | PF3D7_0710600                 | PF07_0043                          | 60S ribosomal protein L34-A                           |
| 6  | PF3D7_0814200                 | PF08_0074                          | DNA/RNA-binding protein Alba                          |
| 7  | PF3D7_0812500                 | PF08_0086                          | RNA binding protein                                   |
| 8  | PF3D7_1002400.1               | PF10_0028                          | RNA binding protein                                   |
| 9  | PF3D7_1004500                 | PF10_0048                          | conserved Plasmodium protein                          |
| 10 | PF3D7_1006200                 | PF10_0063                          | DNA/RNA-binding protein Alba                          |
| 11 | PF3D7_1011800                 | PF10_0115                          | QF122 antigen                                         |
| 12 | PF3D7_1022400                 | PF10_0217                          | pre-mRNA splicing factor                              |
| 13 | PF3D7_1027800                 | PF10_0272                          | 60S ribosomal protein L3                              |
| 14 | PF3D7_1005000                 | PF11_0061                          | histone H4                                            |
| 15 | PF3D7_1110400                 | PF11_0111                          | asparagine-rich antigen                               |
| 16 | PF3D7_11136500.2              | PF11_0377.a (+2)                   | acasein kinase 1                                      |
| 17 | PF3D7_1145400                 | PF11_0465                          | dynammin-like protein                                 |
| 18 | PF3D7_1308200                 | PF13_0044                          | carbamoyl phosphate synthetase                        |
| 19 | PF3D7_1323100                 | PF13_0129                          | 60S ribosomal protein L6                              |
| 20 | PF3D7_1330800                 | PF13_0165                          | conserved Plasmodium protein                          |
| 21 | PF3D7_1331800                 | PF13_0171                          | 60S ribosomal protein L23                             |
| 22 | PF3D7_1341200                 | PF13_0224                          | 60S ribosomal protein L18                             |
| 23 | PF3D7_1342000                 | PF13_0228                          | 40S ribosomal protein S6                              |
| 24 | PF3D7_1352700                 | PF13_0273                          | conserved Plasmodium protein                          |
| 25 | PF3D7_1414800                 | PF14_0146                          | ribonucleoprotein                                     |
| 26 | PF3D7_1424400                 | PF14_0231                          | 60S ribosomal protein L7-3                            |
| 27 | PF3D7_0218500                 | PF08065w                           | small nuclear ribonucleoprotein                       |
| 28 | PF3D7_0302000                 | PF030100c                          | regulatory protein                                    |
| 29 | PF3D7_0316500                 | PF030720w                          | conserved Plasmodium protein                          |
| 30 | PF3D7_0322900                 | PF031020c                          | 40S ribosomal protein S3A                             |
| 31 | PF3D7_0401800                 | PF040080c                          | Plasmodium exported protein (PHISTb)                  |
| 32 | PF3D7_0403700                 | PF04180c                           | CGI-201 protein                                       |
| 33 | PF3D7_0405400                 | PF040265w                          | pre-mRNA splicing factor                              |
| 34 | PF3D7_0410800                 | PF040535w                          | conserved Plasmodium protein                          |
| 35 | PF3D7_0414000                 | PF040685c                          | chromosome associated protein                         |
| 36 | PF3D7_0415900                 | PF040770c                          | 60S ribosomal protein L15                             |
| 37 | PF3D7_0422500                 | PF041060w                          | u5 small nuclear ribonucleoprotein-specific protein   |
| 38 | PF3D7_0422700                 | PF041070w                          | eukaryotic initiation factor                          |
| 39 | PF3D7_0503300                 | PF050160c                          | Ser/Arg-rich splicing factor                          |
| 40 | PF3D7_0507100                 | PF050350c                          | 60S ribosomal protein L4                              |
| 41 | PF3D7_0517300                 | PF050865c                          | putative                                              |
| 42 | PF3D7_0520000                 | PF051005w                          | 40S ribosomal protein S9                              |
| 43 | PF3D7_0523000                 | PF051150w                          | multidrug resistance protein                          |
| 44 | PF3D7_0529400.1               | PF051465w                          | conserved Plasmodium protein                          |
| 45 | PF3D7_0616200                 | PF060785w                          | Ndc80 homologue                                       |
| 46 | PF3D7_0617200                 | PF060835w                          | conserved Plasmodium protein                          |
| 47 | PF3D7_0623100                 | PF061110c                          | coronin binding protein                               |
| 48 | PF3D7_0905400                 | PF090265c                          | RhopH3                                                |
| 49 | PF3D7_0909800                 | PF090475w                          | small nuclear ribonucleoprotein (snRNP)               |
| 50 | PF3D7_0918900                 | PF090925w                          | gamma-glutamylcysteine synthetase                     |
| 51 | PF3D7_1213900                 | PF120675c                          | eukaryotic translation initiation factor 3 subunit 10 |
| 52 | PF3D7_1219100                 | PF120930w                          | clathrin heavy chain                                  |
| 53 | PF3D7_1224000                 | PF121155w                          | >GTP cyclohydrolase I                                 |
| 54 | PF3D7_1224300                 | PF121170w                          | polyadenylate-binding protein                         |
| 55 | PF3D7_1235900                 | PF121735c                          | RNA-processing protein                                |
| 56 | PF3D7_1241200                 | PF121980c                          | conserved Plasmodium protein                          |
| 57 | PF3D7_1252100                 | PF122505c                          | crhoptry neck protein 3                               |
| 58 | PF3D7_1345900                 | MAL13P1.229                        | conserved Plasmodium protein                          |
| 59 | PF3D7_1346300                 | MAL13P1.233                        | nucleic acid binding protein                          |
| 60 | PF3D7_0629200                 | PF061415c                          | DNAJ domain protein                                   |
| 61 | PF3D7_1369700                 | PF13_0362                          | U2 small nuclear ribonucleoprotein A                  |
| 62 | PF3D7_0713800                 | PF07_0052                          | conserved Plasmodium protein                          |
| 63 | PF3D7_0935000                 | PF091695c                          | small nuclear ribonucleoprotein (snRNP)               |
| 64 | PF3D7_1437900                 | PF14_0359                          | HSP40, subfamily A                                    |
| 65 | PF3D7_0802000                 | PF08_0132                          | glutamate dehydrogenase                               |
| 66 | PF3D7_1360900                 | MAL13P1.303                        | polyadenylate-binding protein                         |
| 67 | PF3D7_0725200                 | MAL7P1.139                         | mago nashi protein homolog                            |
| 68 | PF3D7_0723800                 | PF07_0101                          | conserved Plasmodium protein                          |
| 69 | PF3D7_0824800                 | PF08_0028                          | conserved Plasmodium membrane protein                 |
| 70 | PF3D7_0812700                 | PF08_0084                          | RNA-binding protein (U1 snRNP-like)                   |
| 71 | PF3D7_0803700                 | PF08_0125                          | tubulin gamma chain                                   |
| 72 | PF3D7_1008800                 | PF10_0085                          | nucleolar protein NOP5                                |
| 73 | PF3D7_1009400                 | PF10_0091                          | zinc finger protein                                   |
| 74 | PF3D7_1012900                 | PF10_0126                          | conserved Plasmodium protein                          |
| 75 | PF3D7_1102300                 | PF11_0035                          | Plasmodium exported protein                           |
| 76 | PF3D7_1351400                 | PF13_0268                          | 60S ribosomal protein L17                             |
| 77 | PF3D7_1406000                 | PF14_0057                          | RNA-binding protein Alba                              |
| 78 | PF3D7_1415300                 | PF14_0151                          | RNA-binding protein Nova-1                            |
| 79 | PF3D7_1450700                 | PF14_0482                          | conserved Plasmodium protein                          |
| 80 | PF3D7_1461600                 | PF14_0587                          | splicing factor 3B subunit 2-like protein             |
| 81 | PF3D7_1472000                 | PF14_0688                          | Pre-mRNA-splicing factor ISY1 homolog                 |
| 82 | PF3D7_1474500                 | PF14_0713                          | conserved Plasmodium protein                          |
| 83 | PF3D7_1475400                 | PF14_0722                          | cysteine repeat modular protein 4                     |
| 84 | PF3D7_0117800                 | PF080830w                          | 40S ribosomal protein S26e                            |
| 85 | PF3D7_0305300                 | PF030240c                          | conserved Plasmodium membrane protein                 |
| 86 | PF3D7_0308900                 | PF030375c                          | U2 snRNP spliceosome subunit                          |
| 87 | PF3D7_0310700                 | PF030445w                          | Sybindin-like protein                                 |
| 88 | PF3D7_0418500                 | PF040895c                          | Bet3 transport protein                                |
| 89 | PF3D7_0419800                 | PF040960c                          | 60S ribosomal protein L7Ae/L30e                       |
| 90 | PF3D7_0922100                 | PF091085w                          | ubiquitin-like protein                                |
| 91 | PF3D7_0923900                 | PF091175c                          | >cRNA binding protein                                 |
| 92 | PF3D7_0924700                 | PF091215w                          | splicing factor 3A                                    |
| 93 | PF3D7_1227600                 | PF121335w                          | cyclin related protein                                |
| 94 | PF3D7_1240400                 | PF121955w                          | erythrocyte membrane protein 1, PFEMP1                |
| 95 | PF3D7_1241900                 | PF120155w                          | similar to tetratricopeptide repeat domain 1          |
| 96 | PF3D7_0706500                 | MAL7P1.204                         | conserved Plasmodium protein                          |
| 97 | PF3D7_1220100                 | PF120970w                          | pre-mRNA splicing factor                              |
| 98 | PF3D7_1212700                 | PF120625c                          | conserved Plasmodium protein                          |

**Supplementary Table 1. Protein list of PfCK1 interactors obtained by label-free quantitative analysis**

The previous and new PlasmoDB accession numbers of proteins identified as potential PfCK1 interactors are indicated.
